# Supplementary material
Source: PubMed Central journal article supplement (PMC8005443)
Supplement: NIHMS1668738-supplement-1.pdf [file NIHMS1668738-supplement-1.pdf]

## Supplementary Figures

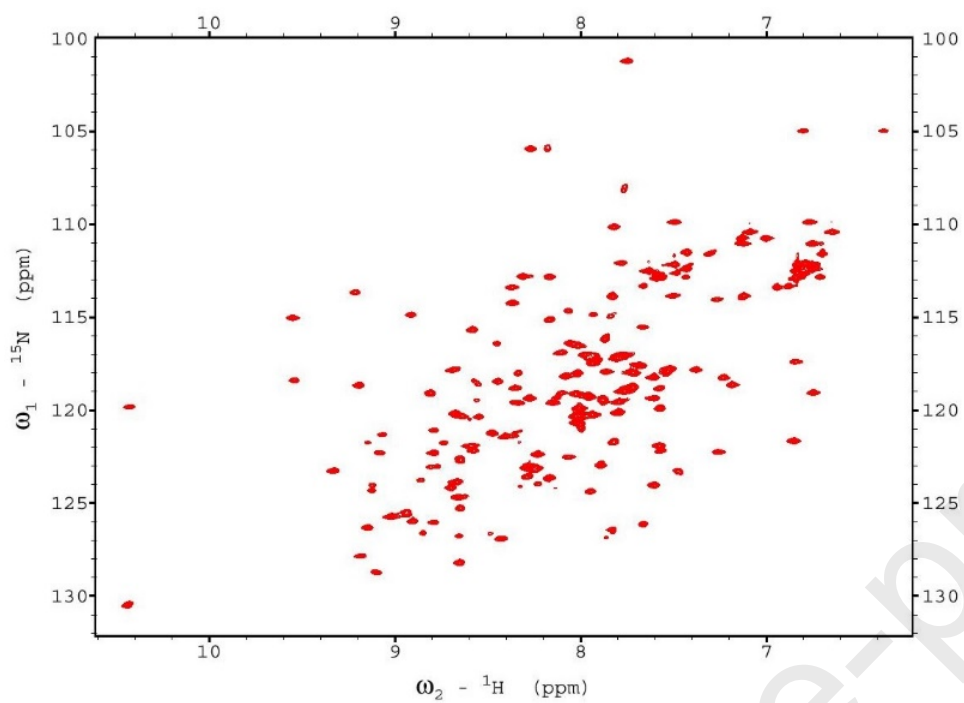

**Supp. Figure 1.**  ${}^1\text{H}$ - ${}^{15}\text{N}$  2D NMR HSQC spectrum of  $157\ \mu\text{M}$   ${}^{13}\text{C}/{}^{15}\text{N}$ -enriched PI3K $\alpha$ -RBD (red) in 20 mM HEPES, 50 mM NaCl, 10 mM dithiothreitol, pH 6.8 acquired at 850 MHz and 25 °C. The spectrum is well dispersed indicative of a well folded protein with most NH resonances detectable.

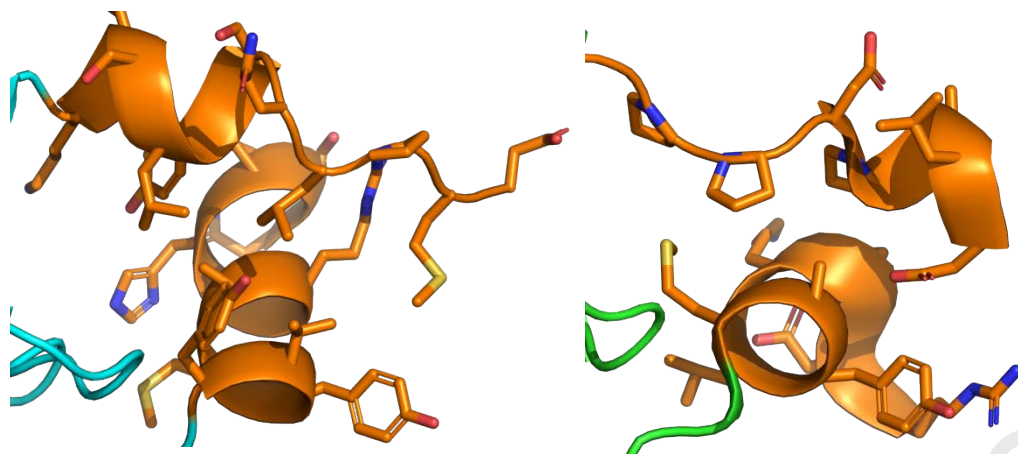

**Supp. Figure 2.** Amino acids are displayed for the termini of the PI3K $\alpha$  (left) and PI3K $\gamma$  (right) RBD structures.

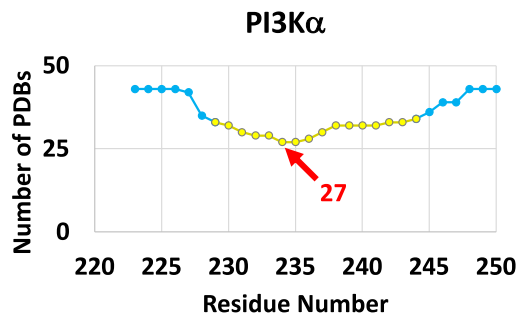Resolution of crystal structures of PI3K $\alpha$ 

| Resolution (Å) | Count |
|----------------|-------|
| 2.0-2.5        | 4     |
| 2.5-3.0        | 16    |
| > 3.0          | 24    |
| Total          | 44    |

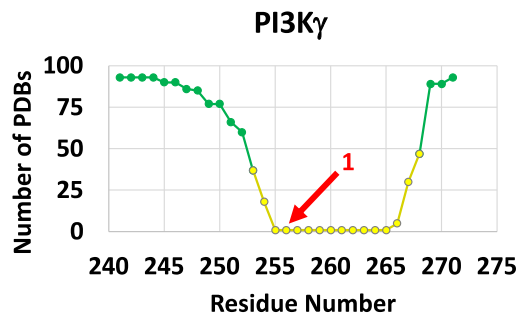Resolution of crystal structures of PI3K $\gamma$ 

| Resolution (Å) | Count |
|----------------|-------|
| 2.0-2.5        | 16    |
| 2.5-3.0        | 65    |
| > 3.0          | 12    |
| Total          | 93    |

**Supp. Figure 3.** A count of the number of PDB files that contain coordinates for residues within the activation loop of PI3K $\alpha$  (223-250) and PI3K $\gamma$  (241-271) are depicted on the left and right, respectively. The minimum PDB count is indicated in red.

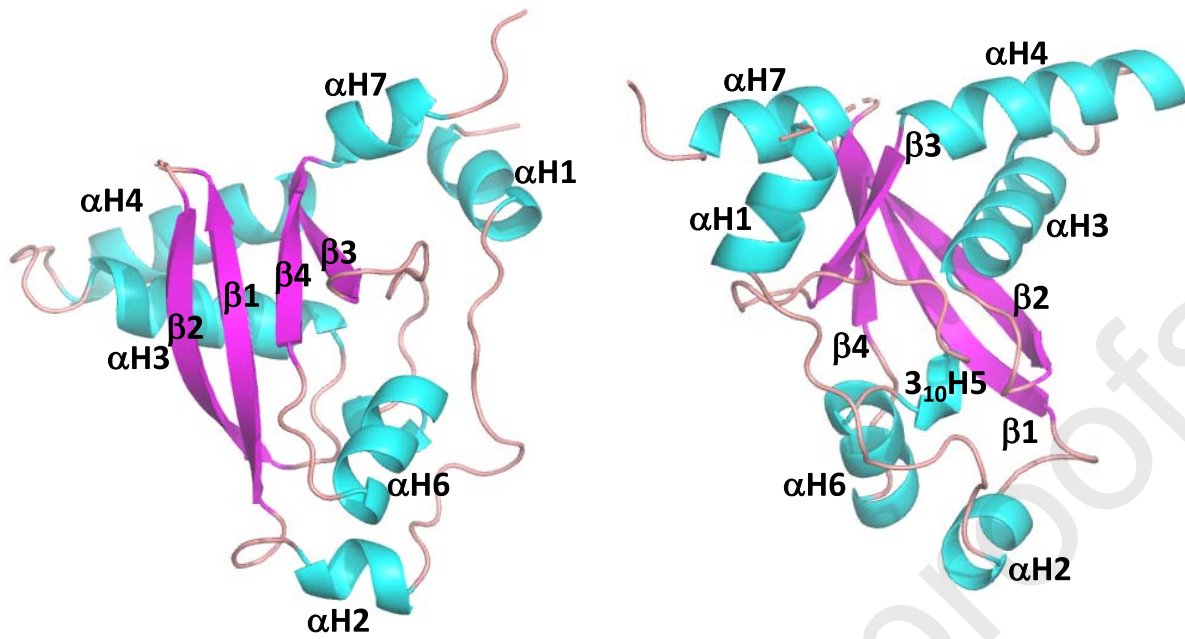

**Supp. Figure 4.** Labeling and representation of the PI3K $\alpha$  RBD construct crystal structure in the context of secondary structure. Helical regions are in cyan, beta sheet regions are in magenta and loop and connecting regions are colored beige. Helices and beta sheets are numbered separately from N-terminus to C-terminus.

| Description                                             | PDB ID | Start Residue | End Residue | Total No. Residues* | No. Helical | % Helical |
|---------------------------------------------------------|--------|---------------|-------------|---------------------|-------------|-----------|
| PI3K $\gamma$ , HRAS-bound                              | 1HE8   | 191           | 316         | 126                 | 36          | 29%       |
| PI3K $\gamma$ , unbound                                 | 6T3B   | 191           | 316         | 126                 | 25          | 20%       |
| PI3K $\gamma$ , unbound, exclude N-term $\alpha$ -helix | 6T3B   | 199           | 316         | 126                 | 19          | 15%       |
| PI3K $\alpha$ , unbound                                 | 3HHM   | 157           | 300         | 144                 | 55          | 38%       |
| PI3K $\alpha$ , unbound, exclude N-term $\alpha$ -helix | 3HHM   | 167           | 316         | 144                 | 46          | 32%       |
| PI3K $\alpha$ , exclude both helices at termini         | 3HHM   | 167           | 289         | 144                 | 40          | 28%       |

**Supp. Table 1.** The secondary structure assignment for each crystal structure was calculated by the STRIDE webserver [54]. Each PDB structure of the full-length PI3K was truncated to the specified residue before upload. Residues designated as alpha helical were counted and divided by the total number of residues in the RBD construct expressed *in vitro*. The unbound PI3K $\gamma$  construct was chosen based on similar resolution to 1HE8 (~3.0 Å) [55].

|                                | $\Delta G$<br>(REU*) | $\Delta G/\Delta SASA$<br>(REU/Å <sup>2</sup> ) | $\Delta SASA_{int}$ (Å <sup>2</sup> ) |
|--------------------------------|----------------------|-------------------------------------------------|---------------------------------------|
| <b>PI3K<math>\alpha</math></b> | 20                   | 0.7                                             | 2986                                  |
| <b>PI3K<math>\gamma</math></b> | 66                   | 2.5                                             | 2701                                  |

\* Rosetta Energy Units (REU)

**Supp. Table 2.** Analysis of RBD Intramolecular Contacts. The p110 subunit of PI3K $\alpha$  and PI3K $\gamma$  were extracted from PDB ID: 3HHM and 1HE8, respectively. Whereas most of the p110 subunit was classified as chain A, the RBD domain was renamed chain B. The interface between the two chains was minimized and repacked in order to reach a lower energy structure before calculating the  $\Delta SASA_{int}$  (SASA at interface),  $\Delta G$  (difference in total energy between bound and unbound,  $\Delta G_{separated}$ ), and  $\Delta G/\Delta SASA$  (quality of interface) with RosettaScripts (see Supplemental Method for example script). The lowest energy structure ( $\Delta G/\Delta SASA$ ) of 10 independent runs is presented.
